# Supplementary material for: Nutritional profile of rodent diets impacts experimental reproducibility in microbiome preclinical research
Source: PubMed Central journal article supplement (PMC7575541; doi:10.1038/s41598-020-74460-8), 2020-10-20

**Title: Nutritional profile of rodent diets impacts experimental reproducibility in microbiome preclinical research**

**Authors:** CJ Tuck<sup>1,2+\*</sup>, G De Palma<sup>3+</sup>, K Takami<sup>1</sup>, B Brant<sup>1</sup>, A Caminero<sup>3</sup>, DE Reed<sup>1</sup>, JG Muir<sup>4</sup>, PR Gibson<sup>4</sup>, A Winterborn<sup>5</sup>, EF Verdu<sup>3</sup>, P Bercik<sup>3</sup>, S Vanner<sup>1</sup>

**SUPPLEMENTARY FIGURES**

**Supplementary Figure 1. *In vivo* study protocol**

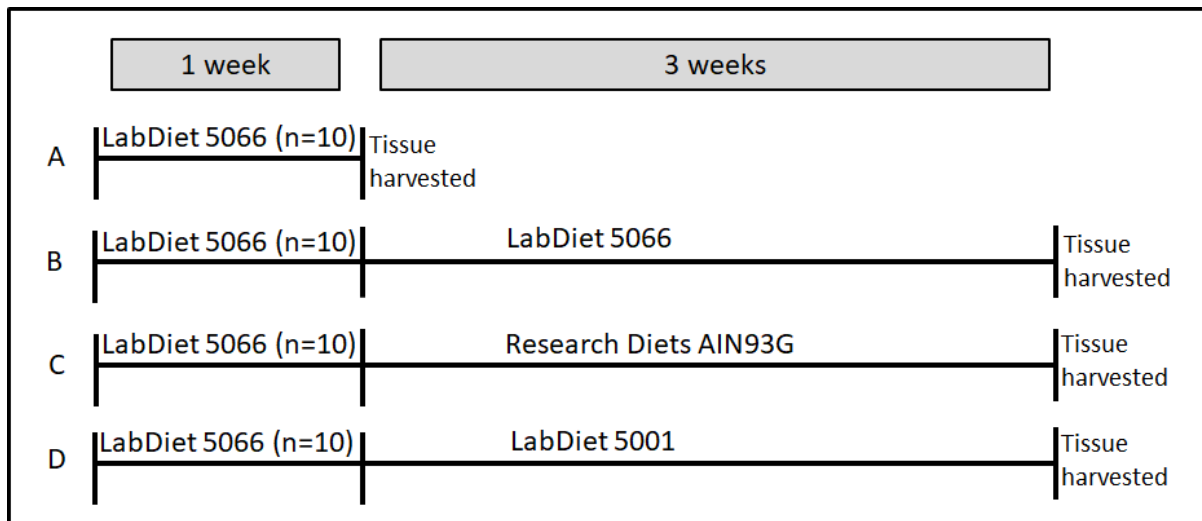

**Supplementary Figure 2. Diets used in the United States of America, Canada, Australia, India, Ireland, Antigua and Barbuda.** A wide variety of commercially available rodent diets were reported to be used by universities and industry. Those marked in black indicate diets assessed in dietary compositional studies (study aim 2).

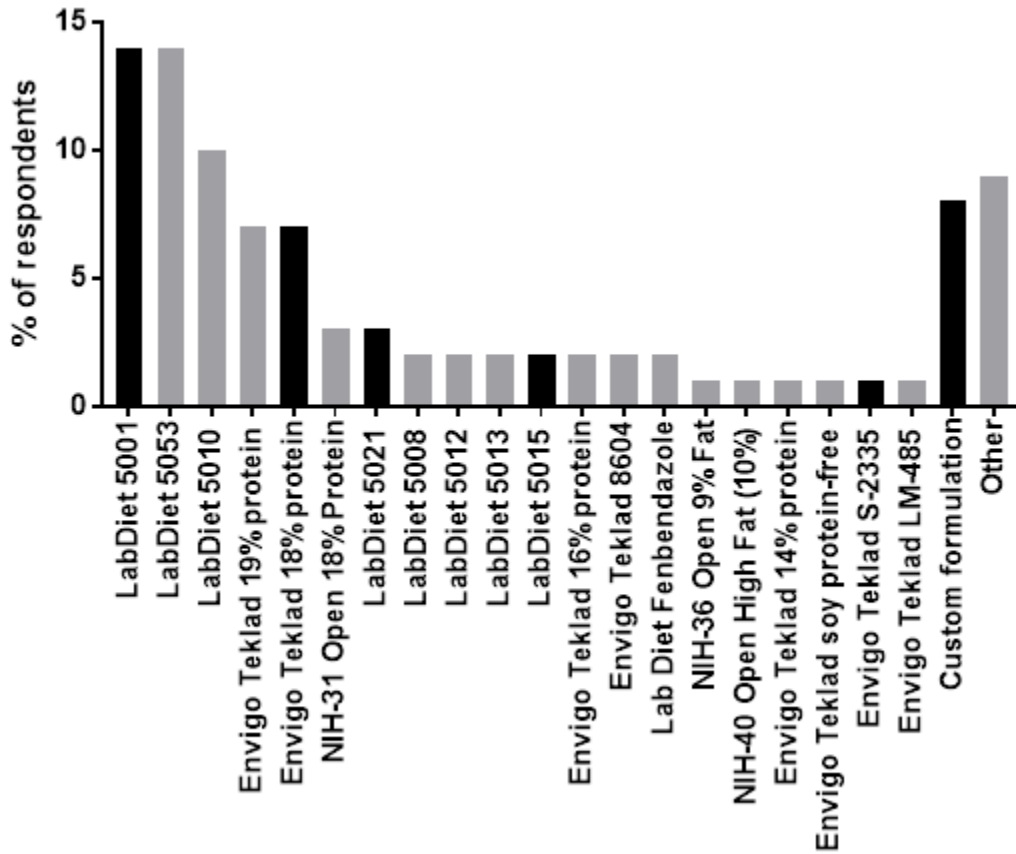

**Supplementary Figure 3. The impact of different commercially available rodent diets on gut microbiota composition.** Analysis conducted using MaAsLin (Multivariate Analysis by Linear Models)[26] of the taxonomy table at genus level. All P values were corrected for FDR, allowing a 5% of FDR.

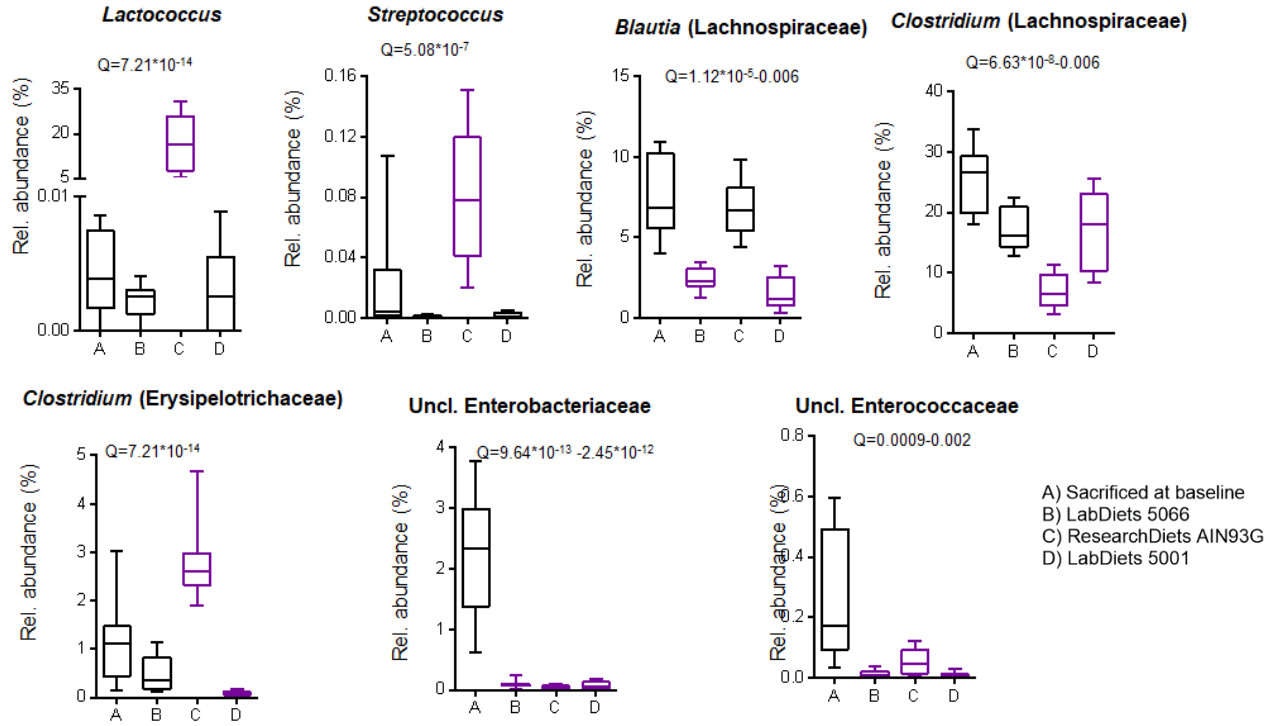

In violet the diets that were significantly associated with changes in the respective bacterial genera

Supplementary Figure 4. (A) Short-chain fatty acid analysis of cecal contents (displayed with median).

(B) Branched-chain fatty acid analysis of cecal contents (displayed with mean). Females are shown

here as pink dots and males as blue dots. Statistical analysis conducted via one-way ANOVA.

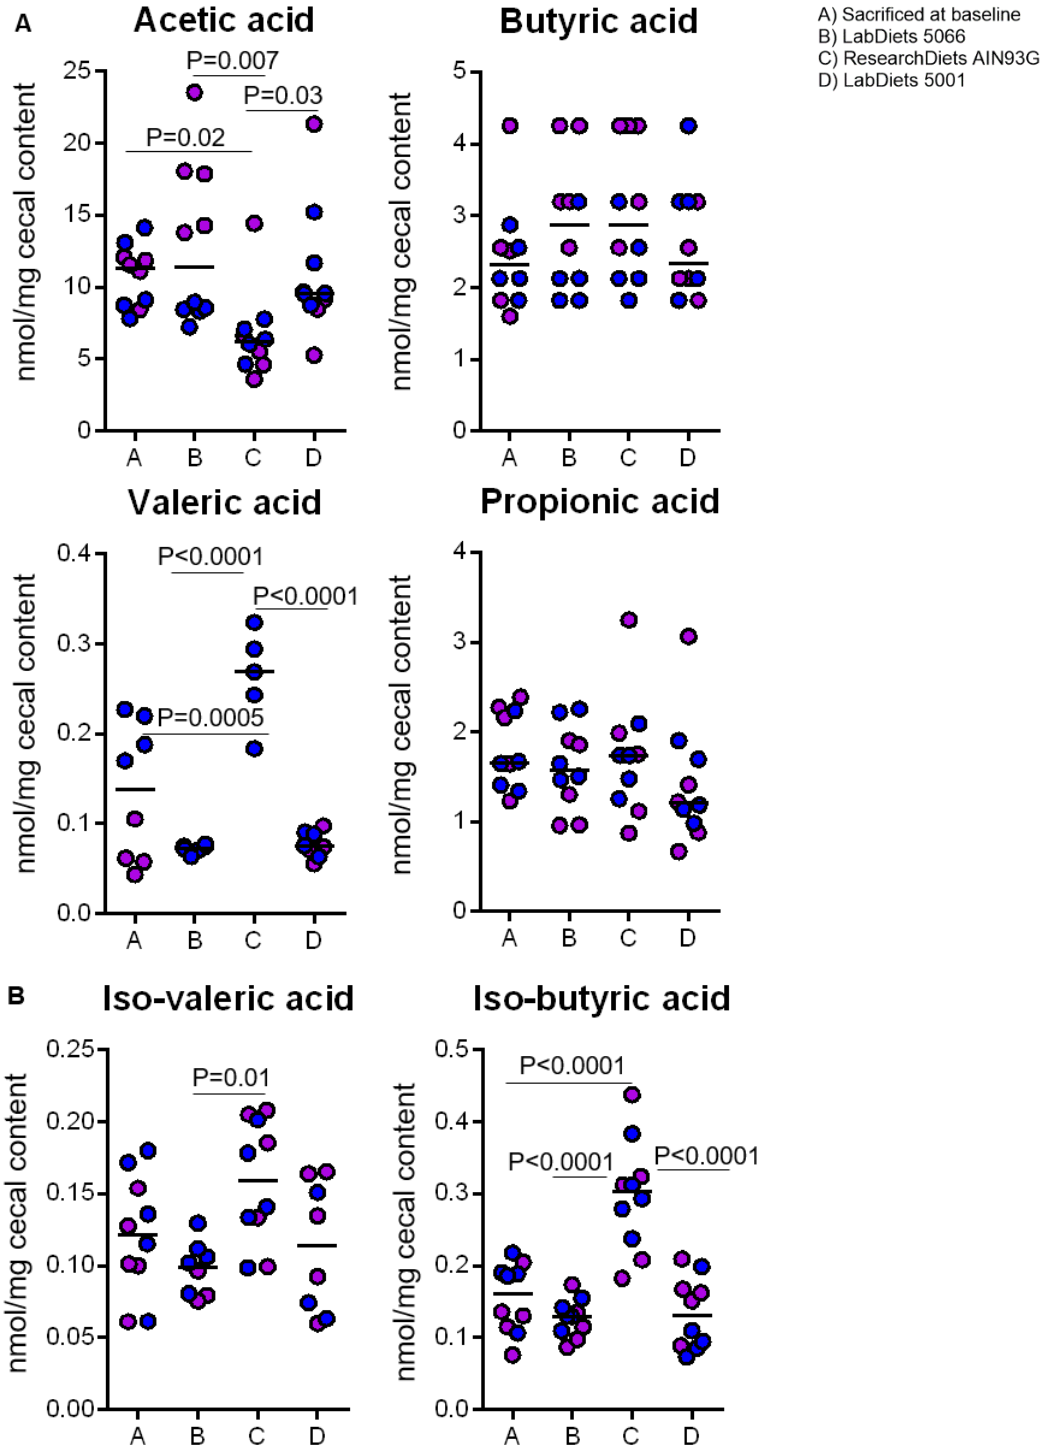

Supplement: 41598_2020_74460_MOESM1_ESM.pdf [file 41598_2020_74460_MOESM1_ESM.pdf]
